# Supplementary material for: First Insight into the Gut Microbiome of Rohu Fish from Halda River and Kaptai Lake Using 16S rRNA Sequencing
Source: Research Square preprint supplement (doi:10.21203/rs.3.rs-7192852/v1), 2025-08-12
Supplement: Supplementary file 1 [file 01a105a951e7336531111932.docx]

**Supplementary table 1.** Summary of metadata and SRA accession numbers of the 16S rRNA amplicon sequences of Rohu gut samples, along with OTUs mapped against bacterial taxa, and raw reads.

| Sample ID | Collection site | Coordinate | Source | Category | No. of raw reads | No. of mapped reads (%) | No. of observed OTUs | SRA accessions |
| --- | --- | --- | --- | --- | --- | --- | --- | --- |
| HR1 | Halda river, Hathazari | 22.4997° N, 91.8717° E | Fish | Halda river fish | 27232 | 27229 (99.99%) | 73 | SRR33766029 |
| HR2 | Halda river, Hathazari | 22.4997° N, 91.8717° E | Fish | Halda river fish | 21019 | 21007 (99.94%) | 54 | SRR33766028 |
| HR3 | Halda river, Hathazari | 22.4997° N, 91.8717° E | Fish | Halda river fish | 12427 | 12422 (99.56%) | 56 | SRR33766017 |
| HR4 | Halda river, Hathazari | 22.4970° N, 91.8733° E | Fish | Halda river fish | 35706 | 35690 (99.56%) | 86 | SRR33766016 |
| HRW1 | Halda river, Hathazari | 22.4997° N, 91.8717° E | Water | Halda river water | 31851 | 31845 (99.98%) | 86 | SRR33766013 |
| HRW2 | Halda river, Hathazari | 22.4997° N, 91.8717° E | Water | Halda river water | 24903 | 24895 (99.97%) | 99 | SRR33766012 |
| HRW3 | Halda river, Hathazari | 22.4970° N, 91.8733° E | Water | Halda river water | 41784 | 41778 (99.99%) | 112 | SRR33766011 |
| HRW4 | Halda river, Hathazari | 22.4970° N, 91.8733° E | Water | Halda river water | 24047 | 24040 (99.97%) | 97 | SRR33766010 |
| KL1 | Kaptai lake, Rangamati | 22.5978° N, 92.2133° E | Fish | Kaptai lake fish | 45357 | 45347 (99.98%) | 90 | SRR33766027 |
| KL2 | Kaptai lake, Rangamati | 22.5978° N, 92.2133° E | Fish | Kaptai lake fish | 27074 | 27065 (99.97%) | 62 | SRR33766026 |
| KL3 | Kaptai lake, Rangamati | 22.5978° N, 92.2133° E | Fish | Kaptai lake fish | 41132 | 41130 (99.99%) | 85 | SRR33766025 |
| KL4 | Kaptai lake, Rangamati | 22.6447° N, 92.2019° E | Fish | Kaptai lake fish | 35858 | 35855 (99.99%) | 72 | SRR33766024 |
| KLW1 | Kaptai lake, Rangamati | 22.5978° N, 92.2133° E | Water | Kaptai lake water | 67776 | 67766 (99.99%) | 128 | SRR33766021 |
| KLW2 | Kaptai lake, Rangamati | 22.5978° N, 92.2133° E | Water | Kaptai lake water | 38983 | 38980 (99.99%) | 120 | SRR33766020 |
| KLW3 | Kaptai lake, Rangamati | 22.6447° N, 92.2019° E | Water | Kaptai lake water | 44900 | 44895 (99.99%) | 127 | SRR33766019 |
| KLW4 | Kaptai lake, Rangamati | 22.6447° N, 92.2019° E | Water | Kaptai lake water | 32615 | 32612 (99.99%) | 101 | SRR33766018 |
