# Supplementary material for: First Insight into the Gut Microbiome of Rohu Fish from Halda River and Kaptai Lake Using 16S rRNA Sequencing
Source: Research Square preprint supplement (doi:10.21203/rs.3.rs-7192852/v1), 2025-08-12
Supplement: Supplementary file 2 [file 63d22329a6fbcf939ac6bad4.xlsx]

## Sheet: Sheet1
	Relative abundance at Phylum level (<0.1% are excluded)
	Halda river fish				Halda river water				Kaptai lake fish				Kaptai lake water
	Phylum	Abundance			Phylum	Abundance			Phylum	Abundance			Phylum	Abundance
	Firmicutes	33.0917			Firmicutes	70.9568			Firmicutes	92.1645			Proteobacteria	85.8818
	Planctomycetota	29.8249			Proteobacteria	12.3305			Proteobacteria	3.35983			Actinobacteriota	2.07511
	Proteobacteria	18.1404			Planctomycetota	6.32527			Planctomycetota	2.00793			Planctomycetota	3.22512
	Verrucomicrobiota	4.80736			Cyanobacteria	2.48263			Verrucomicrobiota	0.538047			Cyanobacteria	1.90098
	Bdellovibrionota	3.16999			Actinobacteriota	2.28627			Acidobacteriota	0.214287			Bacteroidota	2.22216
	Actinobacteriota	3.5417			Verrucomicrobiota	1.75672			Cyanobacteria	0.178673			Firmicutes	2.10702
	Cyanobacteria	1.50709			Bacteroidota	0.826284			Bdellovibrionota	0.037623			Deinococcota	0.445974
	Acidobacteriota	0.95013			Bdellovibrionota	0.547885			Actinobacteriota	0.156931			Verrucomicrobiota	1.46851
	Bacteroidota	0.454016			Acidobacteriota	0.302449							Acidobacteriota	0.17491
	Chloroflexi	0.231072			Deinococcota	0.322208
	Nitrospirota	0.199913			Chloroflexi	0.113408
	Desulfobacterota	0.18271
	Relative abundance at Class level (<0.1% are excluded)
	Halda river fish				Halda river water				Kaptai lake fish				Kaptai lake water
	Class	Abundance			Class	Abundance			Class	Abundance			Class	Abundance
	Planctomycetes	29.8249			Bacilli	65.2634			Bacilli	91.5335			Gammaproteobacteria	77.9773
	Clostridia	15.2177			Gammaproteobacteria	9.02378			Gammaproteobacteria	2.18161			Alphaproteobacteria	7.58986
	Bacilli	19.1008			Planctomycetes	6.32527			Planctomycetes	2.00793			Planctomycetes	3.1676
	Gammaproteobacteria	9.1792			Clostridia	5.69339			Alphaproteobacteria	1.06284			Actinobacteria	1.50341
	Alphaproteobacteria	8.94552			Cyanobacteriia	2.48263			Clostridia	0.583448			Cyanobacteriia	1.90098
	Verrucomicrobiae	4.80736			Alphaproteobacteria	2.90998			Verrucomicrobiae	0.538047			Bacteroidia	2.22216
	Oligoflexia	3.16999			Verrucomicrobiae	1.75672			Acidobacteriae	0.214287			Bacilli	1.96671
	Actinobacteria	3.31367			Actinobacteria	1.3461			Cyanobacteriia	0.178673			Deinococci	0.445974
	Cyanobacteriia	1.50709			Acidimicrobiia	0.781102			Oligoflexia	0.037623			Verrucomicrobiae	1.46851
	Acidobacteriae	0.95013			Bacteroidia	0.826284			Actinobacteria	0.156931			Acidimicrobiia	0.606862
	Bacteroidia	0.454016			Oligoflexia	0.547885							Acidobacteriae	0.17491
	Nitrospiria	0.199913			Acidobacteriae	0.302449							Clostridia	0.147161
	Desulfobaccia	0.18271			Deinococci	0.322208
	Thermoleophilia	0.199546			Thermoleophilia	0.111017
	Unknown	0.182758			Ktedonobacteria	0.113408
	Ktedonobacteria	0.116656
	Relative abundance at Order level (<0.1% are excluded)
	Halda river fish				Halda river water				Kaptai lake fish				Kaptai lake water
	Order	Abundance			Order	Abundance			Order	Abundance			Order	Abundance
	Pirellulales	20.7858			Exiguobacterales	41.9265			Lactobacillales	89.8087			Pseudomonadales	72.2128
	Clostridiales	11.7011			Bacillales	23.6297			Pseudomonadales	1.11149			Sphingomonadales	6.47794
	Rhizobiales	8.12058			Pseudomonadales	7.13142			Gemmatales	1.09124			Burkholderiales	5.36426
	Bacillales	7.09326			Pirellulales	4.2232			Rhizobiales	0.946277			Synechococcales	1.90098
	Pseudomonadales	6.91537			Clostridiales	4.03257			Bacillales	0.763997			Pirellulales	1.70648
	Lactobacillales	6.40901			Synechococcales	2.48263			Pirellulales	0.746842			Frankiales	1.43017
	Gemmatales	6.31239			Rhizobiales	2.45769			Exiguobacterales	0.539852			Flavobacteriales	1.31004
	Chthoniobacterales	4.32816			Burkholderiales	1.71096			Enterobacterales	0.49838			Gemmatales	1.12749
	Oligoflexales	3.16999			Gemmatales	1.62279			Chthoniobacterales	0.462203			Chthoniobacterales	0.933712
	Exiguobacterales	2.80829			Lactobacillales	1.53055			Clostridiales	0.275973			Lactobacillales	0.907269
	Corynebacteriales	2.17708			Peptostreptococcales-Tissierellales	1.4159			Peptostreptococcales-Tissierellales	0.253226			Rhizobiales	0.849038
	Peptostreptococcales-Tissierellales	2.06541			Chthoniobacterales	1.24696			Isosphaerales	0.234739			Microtrichales	0.606862
	Isosphaerales	1.85753			Microtrichales	0.781102			Synechococcales	0.156651			Exiguobacterales	0.545491
	Synechococcales	1.50709			Corynebacteriales	0.6865			Paenibacillales	0.152751			Chitinophagales	0.457927
	Oscillospirales	1.36419			Isosphaerales	0.488265			Burkholderiales	0.141805			Methylacidiphilales	0.452337
	Legionellales	1.0367			Frankiales	0.452536			Solibacterales	0.119848			Bacillales	0.449529
	Burkholderiales	0.924011			Chitinophagales	0.429586							Deinococcales	0.445974
	Paenibacillales	0.886858			Oligoflexales	0.403715							Isosphaerales	0.220003
	Streptomycetales	0.75982			Deinococcales	0.322208							Caulobacterales	0.218025
	Solibacterales	0.53109			Flavobacteriales	0.308492							Xanthomonadales	0.211099
	Sphingomonadales	0.502021			Verrucomicrobiales	0.302217							Enterobacterales	0.155317
	Flavobacteriales	0.454016			Paenibacillales	0.238388							Gammaproteobacteria Incertae Sedis	0.15151
	Pedosphaerales	0.442702			Oscillospirales	0.20644							Legionellales	0.118097
	Bryobacterales	0.41904			Sphingomonadales	0.20631							Solibacterales	0.117295
	Gammaproteobacteria Incertae Sedis	0.327507			Solibacterales	0.204816							Pedosphaerales	0.10526
	Lachnospirales	0.322682			Legionellales	0.1636							Clostridiales	0.10209
	Holosporales	0.274918			Streptomycetales	0.145501
	Staphylococcales	0.248718			Silvanigrellales	0.14417
	Nitrospirales	0.199913			Ktedonobacterales	0.113408
	Solirubrobacterales	0.199546			Solirubrobacterales	0.111017
	Unknown	0.182758			Pedosphaerales	0.106275
	Desulfobaccales	0.18271
	Propionibacteriales	0.178766
	Ktedonobacterales	0.116656
	Frankiales	0.108814
	Relative abundance at Family level (<0.1% are excluded)
	Halda river fish				Halda river water				Kaptai lake fish				Kaptai lake water
	Family	Abundance			Family	Abundance			Family	Abundance			Family	Abundance
	Pirellulaceae	20.7858			Exiguobacteraceae	41.9265			Lactobacillaceae	77.4954			Moraxellaceae	72.081
	Clostridiaceae	11.7011			Planococcaceae	13.2101			Streptococcaceae	3.64104			Sphingomonadaceae	6.47794
	Bacillaceae	6.61325			Bacillaceae	10.3423			Enterococcaceae	5.42856			Comamonadaceae	3.44087
	Moraxellaceae	6.91537			Moraxellaceae	7.13142			Enterobacteriaceae	0.49838			Cyanobiaceae	1.90098
	Gemmataceae	6.31239			Pirellulaceae	4.2232			Pirellulaceae	0.746842			Sporichthyaceae	1.43017
	Lactobacillaceae	4.55097			Clostridiaceae	4.03257			Moraxellaceae	1.11149			Pirellulaceae	1.70648
	Oligoflexaceae	3.16999			Cyanobiaceae	2.48263			Gemmataceae	1.09124			Weeksellaceae	1.09249
	Exiguobacteraceae	2.80829			Gemmataceae	1.62279			Bacillaceae	0.696701			Deinococcaceae	0.445974
	Cyanobiaceae	1.50709			Peptostreptococcaceae	1.4159			Peptostreptococcaceae	0.253226			Ilumatobacteraceae	0.606862
	Beijerinckiaceae	3.2282			Oxalobacteraceae	1.24198			Exiguobacteraceae	0.539852			Gemmataceae	1.12749
	Xanthobacteraceae	2.60925			Rhizobiales Incertae Sedis	1.17922			Beijerinckiaceae	0.119881			Chitinophagaceae	0.444584
	Chthoniobacteraceae	3.07064			Lactobacillaceae	1.15719			Xanthobacteraceae	0.507048			Burkholderiaceae	0.668011
	Peptostreptococcaceae	2.06541			Chthoniobacteraceae	0.90106			Rhizobiaceae	0.0570096			Lactobacillaceae	0.74295
	Mycobacteriaceae	2.17708			Sphingomonadaceae	0.20631			Clostridiaceae	0.262108			Oxalobacteraceae	0.635537
	Rhizobiales Incertae Sedis	1.75238			Ilumatobacteraceae	0.781102			Chthoniobacteraceae	0.251807			Exiguobacteraceae	0.545491
	Isosphaeraceae	1.85753			Mycobacteriaceae	0.6865			Planococcaceae	0.067296			Methylacidiphilaceae	0.452337
	Hungateiclostridiaceae	1.36419			Xanthobacteraceae	0.725688			Xiphinematobacteraceae	0.215786			Xanthobacteraceae	0.427623
	Xiphinematobacteraceae	1.14512			Sporichthyaceae	0.452536			Oligoflexaceae	0.037623			Caulobacteraceae	0.218025
	Streptococcaceae	1.04204			Beijerinckiaceae	0.459524			Isosphaeraceae	0.234739			Terrimicrobiaceae	0.337154
	Legionellaceae	1.0367			Oligoflexaceae	0.403715			Legionellaceae	0.0584457			Beijerinckiaceae	0.320545
	Solibacteraceae	0.53109			Chitinophagaceae	0.429586			Paenibacillaceae	0.152751			Flavobacteriaceae	0.2029
	Paenibacillaceae	0.886858			Isosphaeraceae	0.488265			Listeriaceae	0.0285774			Bacillaceae	0.345957
	Burkholderiaceae	0.82297			Xiphinematobacteraceae	0.267626			Solibacteraceae	0.119848			Chthoniobacteraceae	0.324362
	Propionibacteriaceae	0.178766			Burkholderiaceae	0.29445			Cyanobiaceae	0.156651			Xanthomonadaceae	0.211099
	Streptomycetaceae	0.75982			Weeksellaceae	0.308492							Xiphinematobacteraceae	0.230926
	Enterococcaceae	0.658281			Deinococcaceae	0.322208							Unknown Family	0.15151
	Hyphomicrobiaceae	0.588826			Verrucomicrobiaceae	0.153172							Isosphaeraceae	0.220003
	Planococcaceae	0.132131			Rubritaleaceae	0.152379							Legionellaceae	0.118097
	Sphingomonadaceae	0.502021			Hungateiclostridiaceae	0.20644							Streptococcaceae	0.1109
	Pedosphaeraceae	0.442702			Paenibacillaceae	0.238388							Pseudomonadaceae	0.131835
	Bryobacteraceae	0.41904			Legionellaceae	0.1636							Armatimonadaceae	0.0528875
	Weeksellaceae	0.454016			Solibacteraceae	0.204816							Solibacteraceae	0.117295
	Staphylococcaceae	0.248718			Streptococcaceae	0.207942
	Unknown Family	0.327507			Streptomycetaceae	0.145501
	Lachnospiraceae	0.322682			Silvanigrellaceae	0.14417
	Nitrospiraceae	0.199913			Pedosphaeraceae	0.106275
	Desulfobaccaceae	0.18271			Solirubrobacteraceae	0.111017
	Methylococcaceae	0.0907323			Prolixibacteraceae	0.0637298
	Holosporaceae	0.274918			Enterococcaceae	0.122315
	Solirubrobacteraceae	0.199546
	Unknown	0.182758
	Ktedonobacteraceae	0.116656
	Sporichthyaceae	0.108814
	Relative abundance at Genus level (<0.1% are excluded)
	Halda river fish				Halda river water				Kaptai lake fish				Kaptai lake water
	Genus	Abundance			Genus	Abundance			Genus	Abundance			Genus	Abundance
	Pirellulaceae_uncultured	9.25961			Exiguobacterium	41.9265			Lactiplantibacillus	48.8367			Acinetobacter	71.2449
	Clostridium sensu stricto 1	7.92486			Bacillus	10.0854			Pediococcus	8.81965			Novosphingobium	5.37031
	Acinetobacter	6.91537			Acinetobacter	6.91711			Enterococcus	5.42856			Cyanobium PCC-6307	1.68016
	Bacillus	6.61325			Planococcus	6.56493			Lactococcus	3.33743			hgcI clade	1.43017
	Gemmataceae_uncultured	6.31239			Pirellulaceae_uncultured	2.57572			Limosilactobacillus	3.20404			Pirellulaceae_uncultured	1.39365
	Rhodopirellula	5.61958			Cyanobium PCC-6307	2.35284			Lactobacillus	1.63022			Acidovorax	1.14925
	Pirellula	5.48464			Clostridium sensu stricto 1	2.23377			Companilactobacillus	1.62139			Gemmataceae_uncultured	1.11198
	Sarcina	3.57071			Planomicrobium	1.97592			Acinetobacter	1.11149			Sphingomonas	0.840239
	Lactiplantibacillus	3.5488			Chryseomicrobium	1.82021			Gemmataceae_uncultured	1.07168			Massilia	0.627688
	Exiguobacterium	2.80829			Sarcina	1.7481			Levilactobacillus	0.99109			CL500-29 marine group	0.606862
	Oligoflexaceae_uncultured	2.63802			Gemmataceae_uncultured	1.62279			Lacticaseibacillus	0.901852			Lactiplantibacillus	0.58705
	Mycobacterium	2.17708			Massilia	1.24198			Bacillus	0.696701			Exiguobacterium	0.545491
	LD29	1.9794			Lysinibacillus	1.01473			Exiguobacterium	0.539852			Comamonas	0.468224
	Rhizobiales Incertae Sedis_uncultured	1.75238			Pirellula	0.982119			Pirellulaceae_uncultured	0.471647			Methylacidiphilaceae_uncultured	0.452337
	Romboutsia	1.62306			Lactiplantibacillus	0.952844			Weissella	0.395051			Deinococcus	0.445974
	Methylocystis	1.5447			Romboutsia	0.896804			Latilactobacillus	0.316685			Chryseobacterium	0.409898
	Cyanobium PCC-6307	1.50709			Rhizobiales Incertae Sedis_uncultured	0.845031			Streptococcus	0.30361			Enhydrobacter	0.408487
	Xanthobacteraceae_uncultured	1.47798			CL500-29 marine group	0.781102			Escherichia-Shigella	0.299134			Diaphorobacter	0.37207
	Isosphaeraceae_uncultured	1.40849			Mycobacterium	0.6865			Xanthobacteraceae_uncultured	0.290643			Polynucleobacter	0.364413
	Candidatus Xiphinematobacter	1.14512			Paenisporosarcina	0.595141			Candidatus Xiphinematobacter	0.215786			Bacillus	0.345957
	Candidatus Udaeobacter	1.14227			LD29	0.558839			Bradyrhizobium	0.211762			Terrimicrobium	0.337154
	Bradyrhizobium	1.13126			hgcI clade	0.452536			Candidatus Udaeobacter	0.193843			Delftia	0.274442
	Legionella	1.0367			Xanthobacteraceae_uncultured	0.403375			Ligilactobacillus	0.175312			Cloacibacterium	0.261778
	Paenibacillus	0.847472			Rhodopirellula	0.396075			Romboutsia	0.173771			Terrimonas	0.25276
	Hungateiclostridiaceae_uncultured	0.839151			Isosphaeraceae_uncultured	0.389904			Isosphaeraceae_uncultured	0.165045			Variovorax	0.235708
	Burkholderia-Caballeronia-Paraburkholderia	0.82297			Planococcaceae_uncultured	0.362702			Clostridium sensu stricto 1	0.161341			Pirellula	0.234966
	Blastopirellula	0.793042			Oligoflexaceae_uncultured	0.346591			Cyanobium PCC-6307	0.156651			Candidatus Xiphinematobacter	0.230926
	Streptomyces	0.75982			Paeniclostridium	0.345897			Klebsiella	0.140352			Xanthobacteraceae_uncultured	0.228599
	Enterococcus	0.658281			Deinococcus	0.322208			Paenibacillus	0.134702			Brevundimonas	0.208606
	Lactococcus	0.60838			Bradyrhizobium	0.312312			Burkholderia-Caballeronia-Paraburkholderia	0.126749			Flavobacterium	0.2029
	Hyphomicrobium	0.552027			Sporosarcina	0.305516			Pirellula	0.123906			Bradyrhizobium	0.199517
	Oligoflexus	0.534533			Alsobacter	0.299601			Candidatus Solibacter	0.119848			Synechococcus CC9902	0.196143
	Candidatus Solibacter	0.53109			Candidatus Udaeobacter	0.286845							Candidatus Udaeobacter	0.187839
	Ruminiclostridium	0.525039			Candidatus Xiphinematobacter	0.267626							Burkholderia-Caballeronia-Paraburkholderia	0.180064
	Beijerinckiaceae_uncultured	0.486316			Burkholderia-Caballeronia-Paraburkholderia	0.209003							Isosphaeraceae_uncultured	0.159492
	Elizabethkingia	0.454016			Psychrobacter	0.206268							Acidibacter	0.15151
	ADurb.Bin063-1	0.442702			Candidatus Solibacter	0.204816							Lysobacter	0.148353
	Paeniclostridium	0.442358			Paenibacillus	0.200836							Comamonadaceae_uncultured	0.13236
	Novosphingobium	0.419474			Chryseobacterium	0.19252							Pseudomonas	0.131835
	Bryobacter	0.41904			Methylocystis	0.187266							Rhodoferax	0.123652
	Aquisphaera	0.392488			Lactococcus	0.184404							Aquabacterium	0.119492
	Methylobacterium-Methylorubrum	0.355041			Dinghuibacter	0.179108							Legionella	0.118097
	Pediococcus	0.346609			Legionella	0.1636							Candidatus Solibacter	0.117295
	Lactobacillus	0.345977			Verrucomicrobiaceae_uncultured	0.153172							Polaromonas	0.114038
	Acidibacter	0.327507			Luteolibacter	0.152379							Lactococcus	0.1109
	Epulopiscium	0.322682			Novosphingobium	0.145594							Limnohabitans	0.107895
	Holosporaceae_uncultured	0.274918			Streptomyces	0.145501							LD29	0.101846
	Limosilactobacillus	0.253956			Terrimonas	0.144454
	Clostridium sensu stricto 12	0.252708			Blastopirellula	0.144268
	Staphylococcus	0.248718			Silvanigrellaceae_uncultured	0.14417
	Streptococcus	0.240945			Hungateiclostridiaceae_uncultured	0.135103
	Weissella	0.226738			Synechococcus CC9902	0.129787
	alphaI cluster	0.218111			Elizabethkingia	0.124747
	Nitrospira	0.199913			Enterococcus	0.122315
	Conexibacter	0.199546			Conexibacter	0.111017
	Unknown	0.182758			ADurb.Bin063-1	0.106275
	Desulfobacca	0.18271
	Microvirga	0.163267
	Planococcus	0.132131
	Ktedonobacteraceae_uncultured	0.116656
	hgcI clade	0.108814
	Luteococcus	0.101042
