# Supplementary material for: First Insight into the Gut Microbiome of Rohu Fish from Halda River and Kaptai Lake Using 16S rRNA Sequencing
Source: Research Square preprint supplement (doi:10.21203/rs.3.rs-7192852/v1), 2025-08-12
Supplement: Supplementary file 3 [file 87848ed553a26e6568b1fde3.xlsx]

## Sheet: Sheet1
		Classification based on metabolism
Sample group	Ammonia oxidizer	Dehalogenation	Chitin degradation	Sulfate reducer	Nitrite reducer	Xylan degrader	Degrades aromatic hydrocarbons	Sulfur oxidizer	Chlorophenol degrading	Sulfide oxidizer	Streptomycin producer	Nitrogen fixation	Lignin degrader	Dinitrogen-fixing	Sulfur metabolizing	Sulfur reducer	Selenate reducer	Stores polyhydroxybutyrate
Halda river fish	10.6516	20.7088	8.19927	15.5347	8.41301	12.5803	3.40466	1.88951	1.77948	5.87216	3.90297	3.92447	0.567866	1.53792	0.293418	0.265594	0.178328	0.295948
Halda river water	8.58918	25.2704	7.20199	9.90067	7.28247	8.63585	3.35681	2.67039	2.65826	19.2038	3.60485	0.979301	0.221215	0.119427	0.107668	0.0595297	0.039319	0.0988487
Kaptai river fish	36.4778	34.7341	7.76838	3.16333	1.6116	5.68758	0.698281	0.522708	0.517691	4.49502	0.429737	0.619691	0.0294295	0.018059	0.0712327	0.0504983	3.00816	0.0966491
Kaptai river water	11.5223	11.9555	10.0917	12.0375	11.4318	10.7191	10.682	10.0755	10.0248	0.445806	0.0658483	0.834328	0.00964445	0.00781533	0.0421529	0.0206192	0.00839732	0.0252751
