# Supplementary material for: First Insight into the Gut Microbiome of Rohu Fish from Halda River and Kaptai Lake Using 16S rRNA Sequencing
Source: Research Square preprint supplement (doi:10.21203/rs.3.rs-7192852/v1), 2025-08-12
Supplement: Supplementary file 4 [file c5d354451d57b2928e536922.docx]

| Taxa | Halda river fish | Halda river water | Kaptai lake fish | Kaptai lake fish |
| --- | --- | --- | --- | --- |
| Phylum (n = 16) | 12 | 11 | 8 | 9 |
| Class (n = 27) | 16 | 15 | 10 | 12 |
| Order (n = 75) | 35 | 31 | 16 | 26 |
| Family (n = 109) | 43 | 39 | 24 | 32 |
| Genus (n = 263) | 62 | 56 | 32 | 47 |

**Supplementary table 2:** Taxonomic information of bacteriome in Halda river fish, Halda river water, Kaptai lake fish and Kaptai lake fish.
